# Supplementary material for: Forming 4-Methylcatechol as the Dominant Bioavailable Metabolite of Intraruminal Rutin Inhibits p-Cresol Production in Dairy Cows
Source: MDPI journal article supplement (doi:10.3390/metabo12010016), 2021-12-24

# Forming 4-methylcatechol as the dominant bioavailable metabolite of intraruminal rutin inhibits *p*-cresol production in dairy cows

Yue Guo<sup>1</sup>, Wanda J. Weber<sup>2</sup>, Dan Yao<sup>1</sup>, Luciano Caixeta<sup>3</sup>, Noah P. Zimmerman<sup>4</sup>, Jesse Thompson<sup>4</sup>, Elliot Block<sup>4</sup>, Thomas G. Rehberger<sup>4</sup>, Brian A. Crooker<sup>2</sup>, Chi Chen<sup>1,2\*</sup>

<sup>1</sup>Department of Food Science and Nutrition, University of Minnesota, 1334 Eckles Ave., St. Paul, MN 55108, USA; guoxx390@umn.edu (Y.G.); dyao@umn.edu (D.Y.); chichen@umn.edu (C.C.)

<sup>2</sup>Department of Animal Science, University of Minnesota, 1364 Eckles Ave., St. Paul, MN 55108; weber023@umn.edu (W.W.); crook001@umn.edu (B.C.)

<sup>3</sup>Department of Veterinary Population Medicine, University of Minnesota, 1365 Gortner Ave., St. Paul, MN 55108; lcaixeta@umn.edu (L.C.)

<sup>4</sup>Church & Dwight Animal and Food Production, Waukesha, WI; Noah.Zimmerman@churchdwight.com (N.Z.); Jesse.Thompson@churchdwight.com (J.T.); Elliot.Block@churchdwight.com (E.B.); Tom.Rehberger@churchdwight.com (T.R.)

\*Correspondence: chichen@umn.edu. Tel.: +1-612-624-7704; Fax: +1-612-625-5272.

## SUPPLEMENTARY DATA

**Table S1.** Source of chemicals and reagents used in chemical analysis, LC-MS analysis, structural confirmation, and quantification.

| Chemicals and reagents                                                                                                                 | Vendor                                     |
|----------------------------------------------------------------------------------------------------------------------------------------|--------------------------------------------|
| Acetonitrile (LC-MS grade), Formic acid (LC-MS grade), Hydrochloric acid, Water (LC-MS grade)                                          | Fisher Scientific (Houston, TX)            |
| Amino acid mixture (acidic), Amino acid mixture (basic), <i>tert</i> -Butyl Hydroxyquinone (tBHQ), Dansyl chloride (DC), Hippuric acid | Sigma-Aldrich (St. Louis, MO)              |
| 3,4-Dihydroxyphenylacetic acid (DHPAA), 2-Hydrazinoquinoline (HQ), Rutin, Triphenylphosphine (TPP)                                     | Alfa Aesar (Tewksbury, MA)                 |
| 2-2'-Dipyridyl disulfide (DPDS)                                                                                                        | MP Biomedicals, LLC (Irvine, CA)           |
| Fatty acids standards (C4-C22)                                                                                                         | Nu-Chek Prep, Inc. (Elysian, MN)           |
| Methanol (LC-MS grade)                                                                                                                 | Avantor performance materials (Radnor, PA) |
| 4-Methylcatechol, Quercetin                                                                                                            | Acros Organics (Fair Lawn, NJ)             |
| 3-O-methyl Quercetin/Isorhamnetin                                                                                                      | Frontier Specialty Chemicals (Logan, UT)   |
| 4-O-methyl Quercetin/Tamarixetin                                                                                                       | Cayman Chemical Company (Ann Arbor, MI)    |
| Kaempferol                                                                                                                             | APExBIO (Houston, TX)                      |

**Table S2:** Ingredient and nutrient content of the total mixed ration (TMR).

| Component                                                                                                                                                                                                                                                                                                                                                                                                                                                                                                          | Contribution |
|--------------------------------------------------------------------------------------------------------------------------------------------------------------------------------------------------------------------------------------------------------------------------------------------------------------------------------------------------------------------------------------------------------------------------------------------------------------------------------------------------------------------|--------------|
| Ingredient, % of DM                                                                                                                                                                                                                                                                                                                                                                                                                                                                                                |              |
| Corn silage                                                                                                                                                                                                                                                                                                                                                                                                                                                                                                        | 19.70        |
| Corn, extra fine, rolled                                                                                                                                                                                                                                                                                                                                                                                                                                                                                           | 10.60        |
| Corn gluten                                                                                                                                                                                                                                                                                                                                                                                                                                                                                                        | 4.90         |
| Alfalfa hay, chopped                                                                                                                                                                                                                                                                                                                                                                                                                                                                                               | 5.00         |
| Protein mix <sup>1</sup>                                                                                                                                                                                                                                                                                                                                                                                                                                                                                           | 8.45         |
| QLF commercial dairy mix <sup>2</sup>                                                                                                                                                                                                                                                                                                                                                                                                                                                                              | 2.75         |
| Cottonseed, Fuzzy                                                                                                                                                                                                                                                                                                                                                                                                                                                                                                  | 3.20         |
| Megalac <sup>3</sup>                                                                                                                                                                                                                                                                                                                                                                                                                                                                                               | 0.40         |
| Nutrient content, DM basis                                                                                                                                                                                                                                                                                                                                                                                                                                                                                         |              |
| DM, %                                                                                                                                                                                                                                                                                                                                                                                                                                                                                                              | 55.8         |
| Crude protein, %                                                                                                                                                                                                                                                                                                                                                                                                                                                                                                   | 16.4         |
| Acid detergent fiber, %                                                                                                                                                                                                                                                                                                                                                                                                                                                                                            | 17.3         |
| Neutral detergent fiber, %                                                                                                                                                                                                                                                                                                                                                                                                                                                                                         | 17.5         |
| Total digestible nutrients, %                                                                                                                                                                                                                                                                                                                                                                                                                                                                                      | 77.1         |
| Net energy-lactation, Mcal/kg                                                                                                                                                                                                                                                                                                                                                                                                                                                                                      | 1.72         |
| Calcium, %                                                                                                                                                                                                                                                                                                                                                                                                                                                                                                         | 0.95         |
| Phosphorus, %                                                                                                                                                                                                                                                                                                                                                                                                                                                                                                      | 0.41         |
| Magnesium, %                                                                                                                                                                                                                                                                                                                                                                                                                                                                                                       | 0.37         |
| Potassium, %                                                                                                                                                                                                                                                                                                                                                                                                                                                                                                       | 1.44         |
| Sodium, %                                                                                                                                                                                                                                                                                                                                                                                                                                                                                                          | 0.50         |
| Iron, ppm                                                                                                                                                                                                                                                                                                                                                                                                                                                                                                          | 276          |
| Zinc, ppm                                                                                                                                                                                                                                                                                                                                                                                                                                                                                                          | 86.2         |
| Copper, ppm                                                                                                                                                                                                                                                                                                                                                                                                                                                                                                        | 17.4         |
| Manganese, ppm                                                                                                                                                                                                                                                                                                                                                                                                                                                                                                     | 66.5         |
| Molybdenum, %                                                                                                                                                                                                                                                                                                                                                                                                                                                                                                      | 1.8          |
| Sulfur, %                                                                                                                                                                                                                                                                                                                                                                                                                                                                                                          | 0.31         |
| Chloride ion, %                                                                                                                                                                                                                                                                                                                                                                                                                                                                                                    | 0.58         |
| Dietary cation anion difference <sup>4</sup> , mEq/kg                                                                                                                                                                                                                                                                                                                                                                                                                                                              | 227          |
| <sup>1</sup> Extra fine rolled corn, 29.72%; soybean meal 47% protein, 17.50%; canola meal, 12.50%; amino plus (AG Processing, Inc., Omaha, NB), 8.75%; blood meal, 6.25%; calcium carbonate, 5.50%; sodium bicarbonate, 5.00%, distillers grain, 5.00%; WR Elite Dairy Micro (Vita Plus Corporation, Madison, WI), 2.50%; potassium carbonate, 2.00%; UltraMet (Vita Plus Corporation, Madison, WI), 2.00%; sodium chloride, 2.00%; urea 46% N, 1.25%; Rumensin 90 (Elanco Animal Health, Greenfield, IN), 0.03%. |              |
| <sup>2</sup> Molasses-based liquid supplement of soluble sugars. Quality Liquid Feeds, Dodgeville, WI.                                                                                                                                                                                                                                                                                                                                                                                                             |              |
| <sup>3</sup> Arm & Hammer Animal Nutrition, Ewing, NJ.                                                                                                                                                                                                                                                                                                                                                                                                                                                             |              |
| <sup>4</sup> DCAD = (Na+K) - (Cl+S) according to Goff (2018).                                                                                                                                                                                                                                                                                                                                                                                                                                                      |              |

**Table S3:** LC-MS data acquisition condition in a 10-minute run.

| Target compounds                | Column type | Mobile phase                                                                                                                                                           | MS detection mode     |
|---------------------------------|-------------|------------------------------------------------------------------------------------------------------------------------------------------------------------------------|-----------------------|
| Amino acids (dansylated)        | BEH C18     | A: 0.1% formic acid in H <sub>2</sub> O<br>B: 0.1% formic acid in ACN                                                                                                  | Positive              |
| Fatty acids (HQ derivatization) | BEH C18     | A: 2 mM NH <sub>4</sub> OAc in water with 0.05% CH <sub>3</sub> COOH<br>B: 2 mM NH <sub>4</sub> OAc in 95% ACN and 5% H <sub>2</sub> O with 0.05% CH <sub>3</sub> COOH | Positive              |
| Hydrophilic metabolites         | BEH Amide   | A: 0.1% formic acid in H <sub>2</sub> O<br>B: 0.1% formic acid in ACN                                                                                                  | Positive and negative |
| Rutin and quercetin metabolites | BEH C18     | A: 0.1% formic acid in H <sub>2</sub> O<br>B: Methanol                                                                                                                 | Negative              |

**Figure S1.** Scores plot of plasma samples after intraruminal rutin administration.

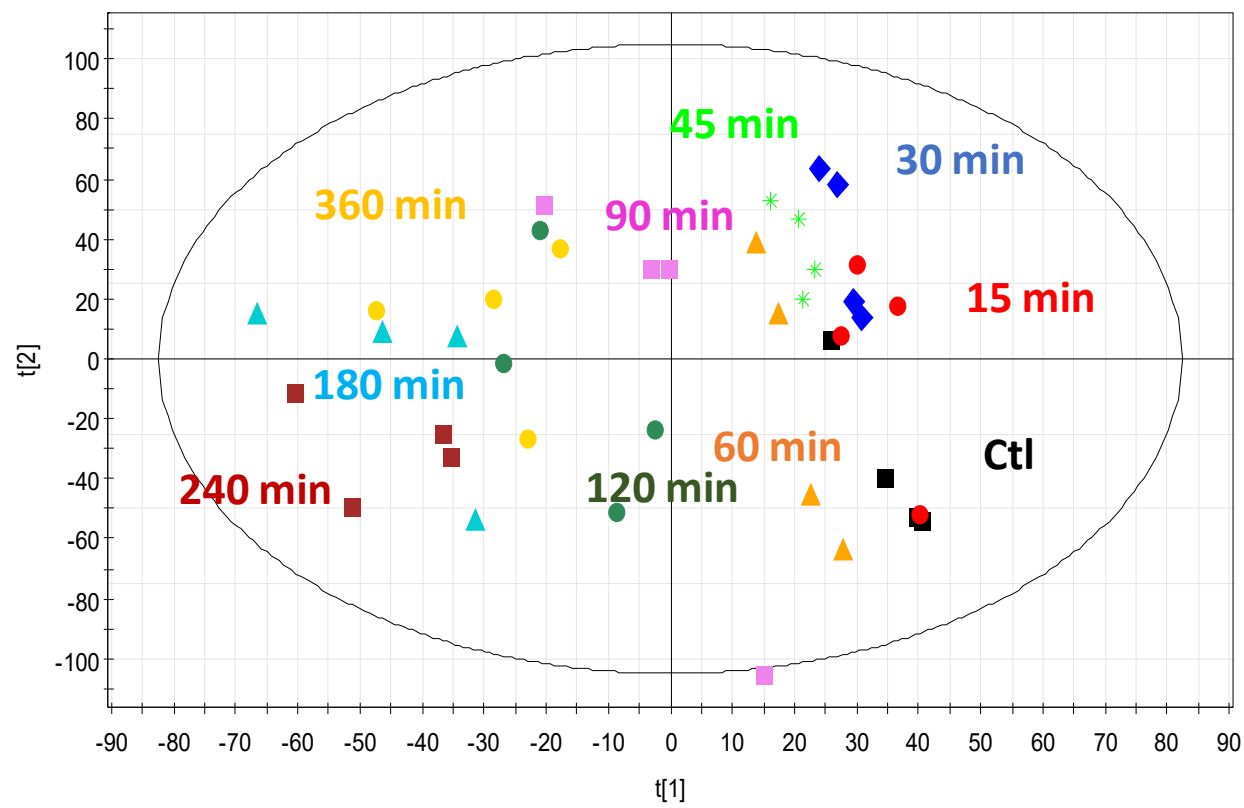

**Figure S2.** Identification of ruminal degradation of rutin in rumen fluid. **(A)** Extracted chromatography of rutin, quercetin, and DHPAA at 30 min, 1 h and 2 h after intraruminal rutin administration. **(B)** MS/MS fragmentation of DHPAA standard, and **(C)** 4-methylcatechol standard.

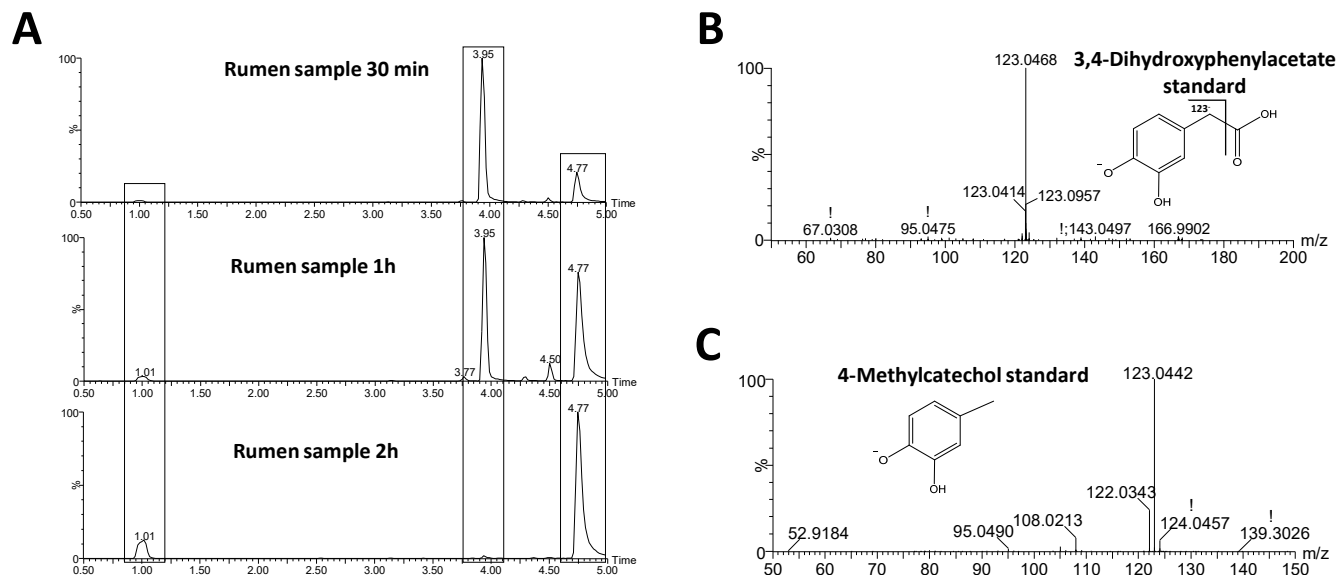

Supplement: s1 [file s1]
